# Supplementary material for: A Minimal Set of Glycolytic Genes Reveals Strong Redundancies in Saccharomyces cerevisiae Central Metabolism
Source: PubMed Central journal article supplement — Eukaryot Cell. 2015 Jul 29;14(8):804–16. doi: 10.1128/EC.00064-15 (PMC4519752; doi:10.1128/ec.00064-15), 2015-07-29
Supplement: EC.00064-15_zek999094457so1.pdf [file EC.00064-15_zek999094457so1.pdf]

# 1 Supplemental Material for Publication

2

3 **Table S1. Single nucleotide variations (SNV's) and gene duplication identified in MG**  
 4 **genome.**

| Single nucleotide variations (SNV's) |              |                                                                                                                                                                                                                                    |                   |
|--------------------------------------|--------------|------------------------------------------------------------------------------------------------------------------------------------------------------------------------------------------------------------------------------------|-------------------|
| Systematic name                      | Name         | Type                                                                                                                                                                                                                               | Amino acid change |
| YER001W                              | <i>MNN1</i>  | MisSense                                                                                                                                                                                                                           | L322F             |
| YBR163W                              | <i>EXO5</i>  | MisSense                                                                                                                                                                                                                           | A195E             |
| YML007W                              | <i>YAP1</i>  | MisSense                                                                                                                                                                                                                           | Q171K             |
| YMR115W                              | <i>MGR3</i>  | MisSense                                                                                                                                                                                                                           | N89D              |
| YLR233C                              | <i>EST1</i>  | MisSense                                                                                                                                                                                                                           | A275V             |
| YLR249W                              | <i>YEF3</i>  | MisSense                                                                                                                                                                                                                           | A99T              |
| YKL073W                              | <i>LHS1</i>  | MisSense                                                                                                                                                                                                                           | E287K             |
| YJL019W                              | <i>MPS3</i>  | MisSense                                                                                                                                                                                                                           | Q201E             |
| YPL097W                              | <i>MSY1</i>  | MisSense                                                                                                                                                                                                                           | A311V             |
| YNR075W                              | <i>COS10</i> | MisSense                                                                                                                                                                                                                           | V70L              |
| YLL040C                              | <i>VPS13</i> | Sense                                                                                                                                                                                                                              | I1944I            |
| Gene duplications                    |              |                                                                                                                                                                                                                                    |                   |
| Systematic name                      | Name         | Function                                                                                                                                                                                                                           |                   |
| Chromosome III                       |              |                                                                                                                                                                                                                                    |                   |
| YCR019w                              | <i>MAK32</i> | Protein necessary for structural stability of L-A double-stranded RNA-containing particles (1)                                                                                                                                     |                   |
| YCR020C                              | <i>PET18</i> | Protein of unknown function                                                                                                                                                                                                        |                   |
| YCR020C-A                            | <i>MAK31</i> | Non-catalytic subunit of N-terminal acetyltransferase of the NatC type                                                                                                                                                             |                   |
| YCR021C                              | <i>HSP30</i> | Hydrophobic plasma membrane localized, stress-responsive protein that negatively regulates the H(+)-ATPase Pma1p; induced by heat shock, ethanol treatment, weak organic acid, glucose limitation, and entry into stationary phase |                   |

|                     |               |                                                                                                                                                                                                                                                                                                                                       |
|---------------------|---------------|---------------------------------------------------------------------------------------------------------------------------------------------------------------------------------------------------------------------------------------------------------------------------------------------------------------------------------------|
| <b>YCR022C</b>      |               | Dubious open reading frame unlikely to encode a protein, based on available experimental and comparative sequence data; YCR022C is not an essential gene                                                                                                                                                                              |
| <b>YCR023C</b>      |               | Vacuolar membrane protein of unknown function; member of the multidrug resistance family; YCR023C is not an essential gene                                                                                                                                                                                                            |
| <b>YCR024C</b>      | <b>SLM5</b>   | Mitochondrial asparaginyl-tRNA synthetase                                                                                                                                                                                                                                                                                             |
| <b>YCR024C-A</b>    | <b>PMP1</b>   | Regulatory subunit for the plasma membrane H(+)-ATPase Pma1p                                                                                                                                                                                                                                                                          |
| <b>YCR024C-B</b>    |               | Putative protein of unknown function                                                                                                                                                                                                                                                                                                  |
| <b>YCR025C</b>      |               | Dubious open reading frame unlikely to encode a protein, based on available experimental and comparative sequence data; YCR025C is not an essential gene                                                                                                                                                                              |
| <b>YCR026C</b>      | <b>NPP1</b>   | Nucleotide pyrophosphatase/phosphodiesterase; mediates extracellular nucleotide phosphate hydrolysis along with Npp2p and Pho5p; activity and expression enhanced during conditions of phosphate starvation; <i>NPP1</i> has a paralog, <i>NPP2</i> , that arose from the whole genome duplication                                    |
| <b>YCR027C</b>      | <b>RHB1</b>   | Putative Rheb-related GTPase involved in regulating canavanine resistance and arginine uptake; member of the Ras superfamily of G-proteins                                                                                                                                                                                            |
| <b>Chromosome V</b> |               |                                                                                                                                                                                                                                                                                                                                       |
| <b>YER093C-A</b>    | <b>AIM11</b>  | Protein of unknown function                                                                                                                                                                                                                                                                                                           |
| <b>YER094C</b>      | <b>PUP3</b>   | Beta 3 subunit of the 20S proteasome involved in ubiquitin-dependent catabolism; human homolog is subunit C10                                                                                                                                                                                                                         |
| <b>YER095W</b>      | <b>RAD51</b>  | Strand exchange protein, forms a helical filament with DNA that searches for homology; involved in the recombinational repair of double-strand breaks in DNA during vegetative growth and meiosis; homolog of Dmc1p and bacterial RecA protein                                                                                        |
| <b>YER096W</b>      | <b>SHC1</b>   | Sporulation-specific activator of Chs3p (chitin synthase III); required for the synthesis of the chitosan layer of ascospores; transcriptionally induced at alkaline pH; <i>SHC1</i> has a paralog, <i>SKT5</i> , that arose from the whole genome duplication                                                                        |
| <b>YER097W</b>      |               | Dubious open reading frame unlikely to encode a functional protein, based on available experimental and comparative sequence data                                                                                                                                                                                                     |
| <b>YER098W</b>      | <b>UBP9</b>   | Ubiquitin-specific protease that cleaves ubiquitin-protein fusions; UB9 has a paralog, UB13, that arose from the whole genome duplication                                                                                                                                                                                             |
| <b>YER099C</b>      | <b>PRS2</b>   | 5-phospho-ribosyl-1(alpha)-pyrophosphate synthetase, synthesizes PRPP, which is required for nucleotide, histidine, and tryptophan biosynthesis; one of five related enzymes, which are active as heteromultimeric complexes; <i>PRS2</i> has a paralog, <i>PRS4</i> , that arose from the whole genome duplication                   |
| <b>YER100W</b>      | <b>UBC6</b>   | Ubiquitin-conjugating enzyme involved in ER-associated protein degradation; located at the cytosolic side of the ER membrane; tail region contains a transmembrane segment at the C-terminus; substrate of the ubiquitin-proteasome pathway                                                                                           |
| <b>YER101C</b>      | <b>AST2</b>   | Lipid raft associated protein; overexpression restores Pma1p localization to lipid rafts which is required for targeting of Pma1p to the plasma membrane; sometimes classified in the medium-chain dehydrogenase/reductases (MDRs) superfamily; <i>AST2</i> has a paralog, <i>AST1</i> , that arose from the whole genome duplication |
| <b>YER102W</b>      | <b>RPS8B</b>  | Protein component of the small (40S) ribosomal subunit; homologous to mammalian ribosomal protein S8, no bacterial homolog; <i>RPS8B</i> has a paralog, <i>RPS8A</i> , that arose from the whole genome duplication                                                                                                                   |
| <b>YER103W</b>      | <b>SSA4</b>   | Heat shock protein that is highly induced upon stress; plays a role in SRP-dependent cotranslational protein-membrane targeting and translocation; member of the HSP70 family; cytoplasmic protein that concentrates in nuclei upon starvation; <i>SSA4</i> has a paralog, <i>SSA3</i> , that arose from the whole genome duplication |
| <b>YER104W</b>      | <b>RTT105</b> | Protein with a role in regulation of Ty1 transposition (1)                                                                                                                                                                                                                                                                            |

6 **Table S2. Differentially expressed MG's genes under aerobic conditions.**

| <b>Up-regulated</b>   |               |             |
|-----------------------|---------------|-------------|
| Systematic name       | Name          | Fold-change |
| YCR019W               | <i>MAK32</i>  | 2.1         |
| YCR020C               | <i>PET18</i>  | 2.1         |
| YCR020C-A             | <i>MAK31</i>  | 2.2         |
| YCR020W-B             | <i>HTL1</i>   | 2.3         |
| YCR021C               | <i>HSP30</i>  | 2.0         |
| YCR026C               | <i>NPP1</i>   | 2.1         |
| YDR046C               | <i>BAP3</i>   | 2.2         |
| YER094C               | <i>PUP3</i>   | 2.2         |
| YER095W               | <i>RAD51</i>  | 2.3         |
| YER099C               | <i>PRS2</i>   | 2.3         |
| YER100W               | <i>UBC6</i>   | 2.1         |
| YER101C               | <i>AST2</i>   | 2.0         |
| YER104W               | <i>RTT105</i> | 2.8         |
| <b>Down-regulated</b> |               |             |
| Systematic name       | Name          | Fold-change |
| YLR159W               | ---           | -4.3        |
| YCL018W               | <i>LEU2</i>   | -3.6        |
| YLR155C               | <i>ASP3-1</i> | -2.6        |
| YOR383C               | <i>FIT3</i>   | -2.4        |

7

8

9 **Table S3. Strains used in this study.**

| Strain name   | Relevant genotype                                                                                                                                    | Reference  |
|---------------|------------------------------------------------------------------------------------------------------------------------------------------------------|------------|
| CEN.PK102-12A | <i>MATa ura3-52 his3-1 leu2-3,112 MAL2-8c SUC2</i>                                                                                                   | (1-3)      |
| CEN.PK113-7D  | <i>MATa MAL2-8c SUC2</i>                                                                                                                             | (1-3)      |
| IMX076        | <i>MATa ura3-52 his3-1 leu2-3,112 MAL2-8c SUC2<br/>glk1::SpHis5</i>                                                                                  | This study |
| IMX080        | <i>MATa ura3-52 his3-1 leu2-3,112 MAL2-8c SUC2<br/>glk1::SpHis5, hxx1::KILEU2</i>                                                                    | This study |
| IMX096        | <i>MATa ura3-52 his3-1 leu2-3,112 MAL2-8c SUC2<br/>glk1::SpHis5, hxx1::KILEU2, tdh1::KanMX</i>                                                       | This study |
| IMX098        | <i>MATa ura3-52 his3-1 leu2-3,112 MAL2-8c SUC2<br/>glk1::SpHis5, hxx1::KILEU2, tdh1::KanMX, tdh2::Hygr</i>                                           | This study |
| IMI175        | <i>MATa ura3-52 his3-1 leu2-3,112 MAL2-8c SUC2<br/>glk1::SpHis5, hxx1::KILEU2, tdh1::KanMX, tdh2::Hygr,<br/>gpm2::KIURA3</i>                         | This study |
| IMX126        | <i>MATa ura3-52 his3-1 leu2-3,112 MAL2-8c SUC2<br/>glk1::SpHis5, hxx1::KILEU2, tdh1::KanMX, tdh2::Hygr,<br/>gpm2, gpm3::KIURA3</i>                   | This study |
| IMX135        | <i>MATa ura3-52 his3-1 leu2-3,112 MAL2-8c SUC2<br/>glk1::SpHis5, hxx1::KILEU2, tdh1::KanMX, tdh2::Hygr,<br/>gpm2, gpm3, eno1::KIURA3</i>             | This study |
| IMX142        | <i>MATa ura3-52 his3-1 leu2-3,112 MAL2-8c SUC2<br/>glk1::SpHis5, hxx1::KILEU2, tdh1::KanMX, tdh2::Hygr,<br/>gpm2, gpm3, eno1, pyk2::KIURA3</i>       | This study |
| IMX151        | <i>MATa ura3-52 his3-1 leu2-3,112 MAL2-8c SUC2<br/>glk1::SpHis5, hxx1::KILEU2, tdh1::KanMX, tdh2::Hygr,<br/>gpm2, gpm3, eno1, pyk2, pdc5::KIURA3</i> | This study |

|                                     |                                                                                                                                                                                  |            |
|-------------------------------------|----------------------------------------------------------------------------------------------------------------------------------------------------------------------------------|------------|
| IMX158                              | <i>MATa ura3-52 his3-1 leu2-3,112 MAL2-8c SUC2<br/>glk1::SpHis5, hxx1::KILEU2, tdh1::KanMX, tdh2::Hygr,<br/>gpm2, gpm3, eno1, pyk2, pdc5, pdc6::KIURA3</i>                       | This study |
| IMX163                              | <i>MATa ura3-52 his3-1 leu2-3,112 MAL2-8c SUC2<br/>glk1::SpHis5, hxx1::KILEU2, tdh1::KanMX, tdh2::Hygr,<br/>gpm2, gpm3, eno1, pyk2, pdc5, pdc6, adh2::KIURA3</i>                 | This study |
| IMX175                              | <i>MATa ura3-52 his3-1 leu2-3,112 MAL2-8c SUC2<br/>glk1::SpHis5, hxx1::KILEU2, tdh1::KanMX, tdh2::Hygr,<br/>gpm2, gpm3, eno1, pyk2, pdc5, pdc6, adh2, adh5::KIURA3</i>           | This study |
| IMX208                              | <i>MATa ura3-52 his3-1 leu2-3,112 MAL2-8c SUC2<br/>glk1::SpHis5, hxx1::KILEU2, tdh1::KanMX, tdh2::Hygr,<br/>gpm2, gpm3, eno1, pyk2, pdc5, pdc6, adh2, adh5,<br/>adh4::KIURA3</i> | This study |
| IMX343                              | <i>MATa ura3-52 his3-1 leu2-3,112 MAL2-8c SUC2<br/>glk1::SpHis5, hxx1::KILEU2, tdh1::KIURA3, tdh2::Hygr,<br/>gpm2, gpm3, eno1, pyk2, pdc5, pdc6, adh2, adh5, adh4</i>            | This study |
| IMX346                              | <i>MATa ura3-52 his3-1 leu2-3,112 MAL2-8c SUC2<br/>glk1::SpHis5, hxx1::KILEU2, tdh1::KIURA3, tdh2::amdSYM,<br/>gpm2, gpm3, eno1, pyk2, pdc5, pdc6, adh2, adh5, adh4</i>          | This study |
| IMX370                              | <i>MATa ura3-52 his3-1 leu2-3,112 MAL2-8c SUC2<br/>glk1::SpHis5, hxx1::KILEU2, tdh1, tdh2, gpm2, gpm3, eno1,<br/>pyk2, pdc5, pdc6, adh2, adh5, adh4</i>                          | This study |
| IMX372 - Minimal<br>Glycolysis (MG) | <i>MATa ura3-52 his3-1 leu2-3,112 MAL2-8c SUC2<br/>glk1::SpHis5, hxx1::KILEU2, tdh1::KIURA3, tdh2, gpm2,<br/>gpm3, eno1, pyk2, pdc5, pdc6, adh2, adh5, adh4</i>                  | This study |

---

10

11

12 **Table S4. Primers used in this study.**

| Name                                  | Sequence 5'→3'                                                                                                                                                                                                                                               | Targeted gene/plasmid                 |
|---------------------------------------|--------------------------------------------------------------------------------------------------------------------------------------------------------------------------------------------------------------------------------------------------------------|---------------------------------------|
| <b>Deletion cassette construction</b> |                                                                                                                                                                                                                                                              |                                       |
| glk1dFW/1712                          | <b>AAACCACAACACCACCCTAATACAACCTCTATCATAACAC<br/>AAGATGCCGCAAGCGAATTGAAGGACAGCTGAAGCTTC<br/>GTACGC</b>                                                                                                                                                        | <i>GLK1</i> /pUG27                    |
| glk1dRV/1713                          | <b>GTACGGTGGGATACGTACACAAACCAAAAAATGTAAAA<br/>AGATCACCGTGCCTAGAATGAAGAACGCATAGGCCACTA<br/>GTGGATCTG</b>                                                                                                                                                      | <i>GLK1</i> /pUG27                    |
| hxx1dFW/1710                          | <b>AAACTCACCCAAACAACTCAATTAGAATACTGAAAAAAT<br/>AAGATGATGACAAGAGGGTCTGAACCTCAGCTGAAGCTTC<br/>GTACGC</b>                                                                                                                                                       | <i>HXX1</i> /pUG73                    |
| hxx1dRV/1711                          | <b>AGGGAGGGAAAAACACATTTATATTTTATTACATTTTTT<br/>TCATTAGCCTAAGTCGTAATTGAGTCGCATAGGCCACTA<br/>GTGGATCTG</b>                                                                                                                                                     | <i>HXX1</i> /pUG73                    |
| TDH1 FW deletion/1800                 | <b>ACACAAAAACAGTACTTCACTAAATTTACACACAAAAAC<br/>AAAATGTATGCCAGCTACCTAGTGCAGCTGAAGCTTC<br/>GTACGC</b>                                                                                                                                                          | <i>TDH1</i> /pUG6 or pDS2 or pDS3     |
| TDH1 RV deletion/1801                 | <b>ATATTCAAAAAAATCATTATCCTCATCAAGATTGCTT<br/>TATTTAGGCCATATCACATTAAGTGCAGCTAGGCCACTA<br/>GTGGATCTG</b>                                                                                                                                                       | <i>TDH1</i> /pUG6 or pDS2 or pDS3     |
| TDH2 FW deletion/1802                 | <b>TTAGTTTCAAATTAATTCATCACACAAACAAACAAAAAC<br/>AAAATGCCGCTTCATCAAGACTGTACAGCTGAAGCTTC<br/>GTACGC</b>                                                                                                                                                         | <i>TDH2</i> /pUG-hphN or pDS2 or pDS3 |
| TDH2 Rv deletion/1803                 | <b>ATAATAAAAACTAAATCATTAAAGTAACTTAAGGAGTTA<br/>AATTTATAGCAGCCGTGCATACGCATGCATAGGCCACTA<br/>GTGGATCTG</b>                                                                                                                                                     | <i>TDH2</i> /pUG-hphN or pDS2 or pDS3 |
| GPM2DcsmFW/2478                       | <b>TTAAACCCAAGAATACATAAAAAAATATAGATATATTA<br/>ACTTAGTAAACAATGCAGCTGAAGCTTCGTACGC</b>                                                                                                                                                                         | <i>GPM2</i> /pUG72                    |
| GPM2DcsmRV/2479                       | <b>TGGTTTTTATTATACTTCGAAAAATACACAATTATATTA<br/>TATACTTACCCCCCTTAATTGAACAACCTCGTATTGGGA<br/>TGTGTCTCTCGAAACACTGCATAGGCCACTAGTGGATCT<br/>G</b>                                                                                                                 | <i>GPM2</i> /pUG72                    |
| GPM3DcsmFW/2480                       | <b>ATTGAGAAATAGTGCAAAAAGATCTACTAATAACGAATA<br/>GTTATGAACATCGAGCTGAGCATCAACACCTTTGACGAG<br/>CTGTTCACCTCGAGAGCTCGTTTTATTAGGTTTC</b>                                                                                                                            | <i>GPM3</i> /pUG72                    |
| GPM3DcsmRV/2481                       | <b>AGGAAACCATGAAAAAATGGCGCTAATTTTTTATTTTT<br/>AAAAACTATTCAAGAGACTTTTATTGTAAATCCTCGATT<br/>GCAGGTTGTTTTAGCATAGGCCACTAGTGGATCTG</b>                                                                                                                            | <i>GPM3</i> /pUG72                    |
| ENO1DUFW/2411                         | <b>AAACCAAGCAACTGCTTATCAACACACAAACACTAAATC<br/>AAAATGTCGAGAGCTCGTTTTATTAGGTTTC</b>                                                                                                                                                                           | <i>ENO1</i> /pUG72                    |
| ENO1DURV/2412                         | <b>AAAAAACGTTGTTTTTTGGACTAGAAGGCTTAATCAAAA<br/>GCTTTATTTATGAAAAATAGCTAGAAGGAATAAGGGATT<br/>ACAAGAGAGATGTTACAAGAGATCCCAATACAACAGATC<br/>AC</b>                                                                                                                | <i>ENO1</i> /pUG72                    |
| PYK2smlFW/7420                        | <b>CTATATTTTACTTTTATCCTCTACGTCCATTGTAAGATT<br/>ACAACAAAAGCCTATCGATGTCGAGAGCTCGTTTTATT<br/>TAGGTTTC</b>                                                                                                                                                       | <i>PYK2</i> /pUG72                    |
| PYK2smlRV/7421                        | <b>GACAATTAATAAAAATTAAGTAAAAAATAAGGACTTTT<br/>AATTTTACTATTTTACCGCTCTGCTTCAAAATGTTTAA<br/>TGTTCTTTGTTTTCTTTAGAGATCCCAATACAACAGATC<br/>AC</b>                                                                                                                  | <i>PYK2</i> /pUG72                    |
| PDC5DCFW-1/2802                       | <b>TTCACTTATTTTACATAATCAATCTCAAAGAGAACAAC<br/>ACAATACAATAACAAGAAGAACAATAATTCGAGAGCTCGT<br/>TTTATTTAGGTTTC</b>                                                                                                                                                | <i>PDC5</i> /pUG72                    |
| PDC5DCRV-1/2760                       | <b>GTAAAAAATACACAAACGTTGAATCATGAGTTTTATGT<br/>TAATTAGCTTATAAGAAAGAGAGGAAAGGACTTACTACA<br/>GTATATTGATCGAGAGATCCCAATACAACAGATCAC<br/>TATTTGCAACAATAATTCGTTTTTGGAGTACACTACTAAT<br/>GGCTTATACTGTATATAAAGAGGACTGCAATAGCACAA<br/>GATTAAGGCATAGGCCACTAGTGGATCTG</b> | <i>PDC5</i> /pUG72                    |
| pdc6DcRV/2459                         | <b>TTCACTTATTTTACATAATCAATCTCAAAGAGAACAAC<br/>ACAATACAATAACAAGAAGAACAATAATTCGAGAGCTCGT<br/>TTTATTTAGGTTTC</b>                                                                                                                                                | <i>PDC6</i> /pUG72                    |

|               |                                                                                                                                      |                   |
|---------------|--------------------------------------------------------------------------------------------------------------------------------------|-------------------|
| pd6DcFW/2458  | <b>TAAAAAACCCAGTAATATAGCAAAAAACATATTGCCAAC<br/>AAAATGCAGCTGAAGCTTCGTACGC</b>                                                         | <i>PDC6/pUG72</i> |
| ADH2DCFV/2804 | <b>ATCAAGCTACAAAAAGCATAACAATCAACTATCAACTATT<br/>AACTATATCGTAATACACAATTCGAGAGCTCGTTTTATT<br/>TAGGTTT</b>                              | <i>ADH2/pUG72</i> |
| ADH2DCRV/2761 | <b>ATGCTTGATAATGAAAACTATAAATCGTAAAGACATAAG<br/>AGATCCGCTTAATTCTATTTACCAAGAAGAAACAAGAAG<br/>TGATAAAAAACAAAGAGATCCCAATACAACAGATCAC</b> | <i>ADH2/pUG72</i> |
| ADH5DCFV/2808 | <b>CTGATTGGAAGATACCTAAGAAAAATTATTTAACTACATA<br/>TCTACAAAATCAAAGCATCATTCGAGAGCTCGTTTTATT<br/>TAGGTTT</b>                              | <i>ADH5/pUG72</i> |
| ADH5DCRV/2763 | <b>GCTTATATAAAAAGTAAAAATATATTCATCAAATTCGTT<br/>ACAAAAGATCAAGACATTGTGAGACAGTAAAGCAGTAGT<br/>TTGCGCTAGAAAAGAGATCCCAATACAACAGATCAC</b>  | <i>ADH5/pUG72</i> |
| ADH4DCFV/2806 | <b>AAAAAAAAAGAAGTAGTTTTAGTTCGCGCATCACGAGG<br/>TACGTGTTTAATATGTCAGATTCGAGAGCTCGTTTTATT<br/>TAGGTTT</b>                                | <i>ADH4/pUG72</i> |
| ADH4DCRV/2762 | <b>AAATAAGGCACACGCATAATTGACGTTTATGAGTTCGTT<br/>CGATTTTTTTATTTCTATAGCTAATCCACTGCGGTGAT<br/>ACTACAGCCATCAGAGATCCCAATACAACAGATCAC</b>   | <i>ADH4/pUG72</i> |

#### Deletion confirmation

|                 |                                |             |
|-----------------|--------------------------------|-------------|
| GLK1FW2/1524    | ATCAGTGCCCAACTCAGCTTCC         | <i>GLK1</i> |
| GLK1RV2/1525    | AACCAAAGGCCCGTTCCGATG          | <i>GLK1</i> |
| KanB r/114      | CGACCAGCATTACATACGA            | <i>TEF2</i> |
| KanA f/113      | CTTGACAGTCTTGACGTGCG           | <i>TEF2</i> |
| HXK1FW/1716     | GACCGCAAAAAAACATAAGGG          | <i>HXK1</i> |
| HXK1RV/1717     | CCGTTCTTCATCTTGATTCTTC         | <i>HXK1</i> |
| iLEU2RV/1721    | GTTAGTGTGAGGTAGGGAAGC          | <i>LEU2</i> |
| iLEU2FW/1720    | CAATTCAGCGCAGTCACG             | <i>LEU2</i> |
| Ctdh1FW/1989    | CCACGTGCAGAACAACATAG           | <i>TDH1</i> |
| Ctdh1RV/1990    | ATAGTCACATATTGTGGGTATGTG       | <i>TDH1</i> |
| KanA/9          | CGCACGTCAAGACTGTCAAG           | <i>TEF2</i> |
| Kan B/10        | TCGTATGTGAATGCTGGTCCG          | <i>TEF2</i> |
| TDH2CFV/2350    | TCAAGTTCCCATTTGGCAATC          | <i>TDH2</i> |
| TDH2RV/2351     | TGGGTGCGCCTGTTGTTTC            | <i>TDH2</i> |
| hygroFW/1993    | GGACGCTCGAAGGCTTTAAC           | <i>Nph</i>  |
| gpm2confFW/2482 | GTTATCACCCACGACGAAG            | <i>GPM2</i> |
| gpm2confRV/2483 | TCTGCATTCAGGAATGTTCTTATAAATATC | <i>GPM2</i> |

|                        |                                   |                    |
|------------------------|-----------------------------------|--------------------|
| UB/2300                | GAAATGCTGGATGGGAAGCG              | <i>URA3</i>        |
| UA/2299                | GGCCCAATCACAACCACATC              | <i>URA3</i>        |
| <b>gpm3confFW/2484</b> | <b>TGCGAGATTTTCATTGACAAGTTCCG</b> | <b><i>GPM3</i></b> |
| <b>gmp3confRV/2485</b> | <b>TACGAGTAGATAAGATGGCTTATGC</b>  | <b><i>GPM3</i></b> |
| ENO1ConFW/2305         | TTCTGGCACACATGATCTCC              | <i>ENO1</i>        |
| ENO1ConRV/2306         | ACATGGGTGACCAAAAGAGC              | <i>ENO1</i>        |
| PYK2ConFW/2307         | CGCAGTTTGCGAACATTACC              | <i>PYK2</i>        |
| <b>PYK2ConRV/2308</b>  | <b>TTTATTTAGCGACGCAGCATAG</b>     | <b><i>PYK2</i></b> |
| pdc5DconfFW/2805       | ATGAGACTTGAATAATGCAGCG            | <i>PDC5</i>        |
| pdc5DconfRV/2807       | GGTTAAAGATCACACCACCC              | <i>PDC5</i>        |
| pdc6confFW/2460        | AGAGACGCGCAGTACGTAAC              | <i>PDC6</i>        |
| pdc6confRV/2461        | TATGCAGATCGGCTGTGGC               | <i>PDC6</i>        |
| adh2DconfFW/2765       | GAACACCGGGCATCTCCAAC              | <i>ADH2</i>        |
| adh2DconfRV/2766       | CGAACACTGCTGAAGCTACC              | <i>ADH2</i>        |
| adh5DconfFW/2769       | TTCTCCTTTCGCGGAAGGATG             | <i>ADH5</i>        |
| adh5DconfRV/2770       | CCAAATGTCCACCGGTTCTC              | <i>ADH5</i>        |
| adh4DconfFW/2767       | TGTGTTTCCAGAAGGATCCCCG            | <i>ADH4</i>        |
| adh4DconfRV/2768       | AAGGCACACGCATAATTGAC              | <i>ADH4</i>        |

- 13 **Bold:** Sequence for targeted integration
- 14 Underlined: Sequence for seamless marker removal
- 15 *Italic:* Sequence for plasmid binding



16 **Table S5. Plasmids used in this study.**

| <b>Plasmid</b> | <b>Marker</b>                                          | <b>Reference</b> |
|----------------|--------------------------------------------------------|------------------|
| pUG27          | <i>Sphis5</i>                                          | (4)              |
| pUG73          | <i>KILEU2</i>                                          | (4)              |
| pUG72          | <i>KIURA3</i>                                          | (4)              |
| pUG6           | <i>KanMX</i>                                           | (5)              |
| pUG-hphNT1     | <i>AgTEF2<sub>pr</sub>-hphNT1-AgTEF2<sub>ter</sub></i> | (6)              |
| pDS2           | <i>amdSYM</i>                                          | (7)              |
| pDS3           | <i>KIURA3</i>                                          | (7)              |

17

18 **Table S6. Experimental conditions used for expression data of glycolytic genes of *S.***  
19 ***cerevisiae* according to (8). The transcript data are searchable at Genome Expression**  
20 **Omnibus ([www.ncbi.nlm.nih.gov/geo](http://www.ncbi.nlm.nih.gov/geo)) under the accession number GSE11452.**

| Experiment No. | Conditions                          |
|----------------|-------------------------------------|
| 1              | Aerobic glucose limited 1           |
| 2              | Aerobic glucose limited 2           |
| 3              | Aerobic glucose limited 3           |
| 4              | Aerobic nitrogen limited 1          |
| 5              | Aerobic nitrogen limited 3          |
| 6              | Aerobic phosphorus limited 1        |
| 7              | Aerobic phosphorus limited 2        |
| 8              | Aerobic phosphorus limited 3        |
| 9              | Aerobic sulfur limited 1            |
| 10             | Aerobic sulfur limited 2            |
| 11             | Aerobic sulfur limited 3            |
| 12             | Anaerobic carbon limited 1          |
| 13             | Anaerobic nitrogen limited 1        |
| 14             | Anaerobic nitrogen limited 2        |
| 15             | Anaerobic nitrogen limited 3        |
| 16             | Anaerobic phosphorus limited 1      |
| 17             | Anaerobic phosphorus limited 2      |
| 18             | Anaerobic phosphorus limited 3      |
| 19             | Anaerobic sulfur limited 1          |
| 20             | Anaerobic sulfur limited 2          |
| 21             | Anaerobic sulfur limited 3          |
| 22             | Anaerobic carbon limited 4          |
| 23             | Anaerobic carbon limited 5          |
| 24             | Anaerobic carbon limited 6          |
| 25             | Aerobic glucose limited 4           |
| 26             | Aerobic glucose limited 5           |
| 27             | Aerobic glucose limited 6           |
| 28             | C-lim Anaerobic reference (pH 5) #1 |
| 29             | C-lim Anaerobic reference (pH 5) #2 |
| 30             | C-lim Anaerobic reference (pH 5) #3 |
| 31             | C-lim Anaerobic Acetate 1           |
| 32             | C-lim Anaerobic Acetate 2           |
| 33             | C-lim Anaerobic Acetate 3           |
| 34             | C-lim Anaerobic Benzoate 1          |
| 35             | C-lim Anaerobic Benzoate 2          |
| 36             | C-lim Anaerobic Benzoate 3          |
| 37             | C-lim Anaerobic Propionate 1        |
| 38             | C-lim Anaerobic Propionate 2        |
| 39             | C-lim Anaerobic Propionate 3        |

40 C-lim Anaerobic Sorbate 1  
41 C-lim Anaerobic Sorbate 2  
42 C-lim Anaerobic Sorbate 3  
43 12C Chemostat anaerobic C-lim 0.03h-1 (1)  
44 12C C-im anaerobic chemostat 0.03h-1 (2)  
45 12C anaerobic C-lim chemostat 0.03h-1 (3)  
46 30C Anaerobic C-lim chemostat 0.03h-1 (1)  
47 30C anaerobic C-lim chemostat 0.03h-1 (2)  
48 30C anaerobic C-lim chemostat 0.03 h-1 (3)  
49 12C anaerobic N-limitation chemostat 0.03h-1 (1)  
50 12C anaerobic N-lim chemostat 0.03h-1 (2)  
51 12C anaerobic N-lim chemostat 0.03h-1 (3)  
52 30C anaerobic N-lim chemostat 0.03h-1 (1)  
53 30C anaerobic N-lim chemostat 0.03h-1 (2)  
54 30C anaerobic N-lim chemostat 0.03h-1 (3)  
55 C-lim aerobic chemostat with ASN as N-source 1  
56 C-lim aerobic chemostat with ASN as N-source 2  
57 C-lim aerobic chemostat with ASN as N-source 3  
58 C-lim aerobic chemostat with Proline as N-source 1  
59 C-lim aerobic chemostat with proline as N-source 2  
60 C-lim aerobic chemostat with proline as N-source 3  
61 C-lim aerobic chemostat with leucine as N-source 1  
62 C-lim aerobic chemostat with leucine as N-source 2  
63 C-lim aerobic chemostat with leucine as N-source 3  
64 C-lim aerobic chemostat with phenylalanine as N-source 2  
65 C-lim aerobic chemostat with phenylalanine as N-source 3  
66 C-lim aerobic chemostat with methionine as N-source 1  
67 C-lim aerobic chemostat with methionine as N-source 2  
68 C-lim aerobic chemostat with methionine as N-source 3  
69 Zinc limited Aerobic chemostat culture -1  
70 Zinc-limited aerobic chemostat culture-2  
71 Zinc-limited Aerobic chemostat culture -3  
72 Zinc-limited Anaerobic chemostat culture-1  
73 Zinc-limited Anaerobic chemostat culture-2  
74 Zinc-limited Anaerobic chemostat culture-3  
75 Carbon-limited Aerobic chemostat culture -1  
76 Carbon-limited Aerobic chemostat culture-2  
77 Carbon-limited Aerobic chemostat culture-3  
78 Nitrogen-limited Aerobic chemostat culture-1  
79 Nitrogen-limited Aerobic chemostat culture-2  
80 Nitrogen-limited Aerobic chemostat culture-3  
81 Nitrogen-limited Anaerobic chemostat culture-1  
82 Nitrogen-limited Anaerobic chemostat culture-3  
83 Nitrogen-limited Anaerobic chemostat culture-2  
84 CENPK113-7D glucose/ethanol limited chemostat -1  
85 CENPK113-7D glucose/ethanol limited chemostat -2

86 CENPK-113-7D glucose/ethanol limited chemostat -3  
 87 CENPK113-7D glucose/ethanol limited chemostat -4  
 88 Ethanol limited chemostat  $D=0.1/h$  -1  
 89 Ethanol limited chemostat  $D= 0.1 /h$  -2  
 90 Ethanol limited chemostat  $D=0.1/h$  -3  
 91 Acetate limited chemostat culture  $D=0.1/h$  -1  
 92 Acetate limited chemostat culture  $D=0.1/h$  -2  
 93 Acetate limited chemostat  $D=0.1/h$  -3  
 94 Maltose limited chemostat culture  $D=0.1/h$  -3  
 95 Anaerobic glucose limited chemostat culture with 100%CO<sub>2</sub>  
 96 Anaerobic glucose limited chemostat culture with 100% CO<sub>2</sub>  $D=0.1/h$  -2  
 97 Anaerobic glucose limited chemostat culture with 100% CO<sub>2</sub>  $D=0.1/h$  -3  
 98 Aerobic glucose limited chemostat culture with 79% CO<sub>2</sub>  $D=0.1/h$  -1  
 99 Aerobic glucose limited chemostat culture with 79% CO<sub>2</sub>  $D=0.1/h$  -2  
 100 Aerobic glucose limited chemostat culture with 79% CO<sub>2</sub>  $D=0.1/h$  -3  
 101 Aerobic nitrogen limited chemostat culture with 79% CO<sub>2</sub>  $D=0.1/h$  -1  
 102 Aerobic nitrogen limited chemostat culture with 79% CO<sub>2</sub>  $D=0.1/h$  -2  
 103 Aerobic nitrogen limited chemostat culture with 79% CO<sub>2</sub>  $D=0.1/h$  -3  
 104 Carbon-limited anaerobic chemostat with benzoate -1  
 105 Carbon-limited anaerobic chemostat with benzoate -2  
 106 Carbon-limited anaerobic chemostat with benzoate -3  
 107 C-lim Anaerobic chemostat dilution rate  $0.05h^{-1}$  - 1  
 108 C-lim Anaerobic chemostat dilution rate  $0.05h^{-1}$  - 2  
 109 C-lim Anaerobic chemostat dilution rate  $0.05h^{-1}$  - 3  
 110 Aerobic galactose C-lim chemostat culture-1  
 111 Aerobic galactose C-lim chemostat culture-2  
 112 Aerobic galactose C-lim chemostat culture-3  
 113 Aerobic galactose C-lim chemostat culture-4  
 114 Aerobic galactose C-lim chemostat culture-5  
 115 Aerobic galactose C-lim chemostat culture-6  
 116 Aerobic S-lim chemostat culture-1  
 117 Aerobic S-lim chemostat culture-2  
 118 C-lim Anaerobic chemostat dilution rate  $0.03h^{-1}$  - 1  
 119 N-lim Anaerobic chemostat dilution rate  $0.03h^{-1}$  - 2  
 120 C-lim Anaerobic chemostat dilution rate  $0.2h^{-1}$  - 1  
 121 C-lim Anaerobic chemostat dilution rate  $0.2h^{-1}$  - 2  
 122 Aerobic pH3.5 C-lim chemostat culture-1  
 123 Aerobic pH3.5 C-lim chemostat culture-2  
 124 Aerobic pH3.5 C-lim chemostat culture-3  
 125 Aerobic pH6.5 C-lim chemostat culture-1  
 126 Aerobic pH6.5 C-lim chemostat culture-2  
 127 Aerobic pH6.5 C-lim chemostat culture-3  
 128 N-lim Anaerobic chemostat dilution rate  $0.2h^{-1}$  - 1  
 129 N-lim Anaerobic chemostat dilution rate  $0.2h^{-1}$  - 2  
 130 C-lim Anaerobic chemostat dilution rate  $0.03h^{-1}$  - 2  
 131 C-lim Anaerobic chemostat dilution rate  $0.03h^{-1}$  - 3

132 Acetate limited chemostat culture  $D=0.1/h$  -4  
 133 Ethanol limited chemostat culture  $D=0.1/h$  -4  
 134 N-lim Anaerobic chemostat dilution rate  $0.2h^{-1}$  - 3  
 135 N-lim Anaerobic chemostat dilution rate  $0.03h^{-1}$  - 3  
 136 N-lim Anaerobic chemostat dilution rate  $0.2h^{-1}$  - 4  
 137 Anaerobic carbon limited with methionine as N-source  
 138 Anaerobic carbon limited with methionine as N-source -2  
 139 Anaerobic carbon limited with methionine as N-source -3  
 140 Aerobic glucose limited chemostat with anaerobic factors (tween and ergosterol) -1  
 141 Aerobic glucose limited chemostat with anaerobic factors (tween and ergosterol) -2  
 142 Aerobic glucose limited chemostat with anaerobic factors (tween and ergosterol) -3  
 143 Aerobic phosphorus limited chemostat with anaerobic factors (tween and ergosterol) -  
 1  
 144 Aerobic phosphorus limited chemostat with anaerobic factors (tween and ergosterol) -  
 2  
 145 Aerobic phosphorus limited chemostat with anaerobic factors (tween and ergosterol) -  
 3  
 146 Anaerobic glucose limited chemostat with methionine as sulfur source-1  
 147 Anaerobic glucose limited chemostat with methionine as sulfur source-2  
 148 Anaerobic glucose limited chemostat with methionine as sulfur source-3  
 149 Anaerobic nitrogen limited chemostat with methionine as nitrogen source-1  
 150 Anaerobic nitrogen limited chemostat with methionine as nitrogen source-2  
 151 Anaerobic nitrogen limited chemostat with methionine as nitrogen source-3  
 152 Anaerobic nitrogen limited chemostat with methionine as nitrogen and sulfur source-1  
 153 Anaerobic nitrogen limited chemostat with methionine as nitrogen and sulfur source-2  
 154 Anaerobic nitrogen limited chemostat with methionine as nitrogen and sulfur source-3  
 155 Anaerobic sulfur limited chemostat -1  
 156 Aerobic glucose limited chemostat with Phenylalanine as N-source-1  
 157 Aerobic glucose limited chemostat with Phenylalanine as N-source-2  
 158 Aerobic glucose limited chemostat with leucine as nitrogen source-1  
 159 Aerobic glucose limited chemostat with leucine as nitrogen source-2  
 160 Iron limited chemostat cultures with ethanol as a carbon source  
 161 Iron limited chemostat cultures with ethanol as a carbon source-2  
 162 Anaerobic nitrogen limited chemostat  $0.03h^{-1}$  -1  
 163 Anaerobic glucose limited chemostat  
 164 Aerobic glucose limited chemostat with 25 mM formate-1  
 165 Aerobic sulfur limited culture (cDNA from total RNA)-2  
 166 C-lim aerobic chemostat with 25mM formate  
 167 CENPK113-7D glucose/ethanol (19mM) limited chemostat -1  
 168 CENPK113-7D glucose/ethanol (19mM) limited chemostat -2  
 169 CENPK113-7D glucose/ethanol (19mM) limited chemostat -3  
 170 C-lim Aerobic chemostat with maltose as C-source 1

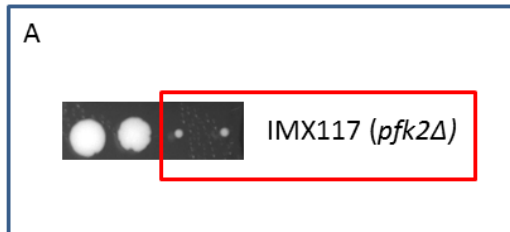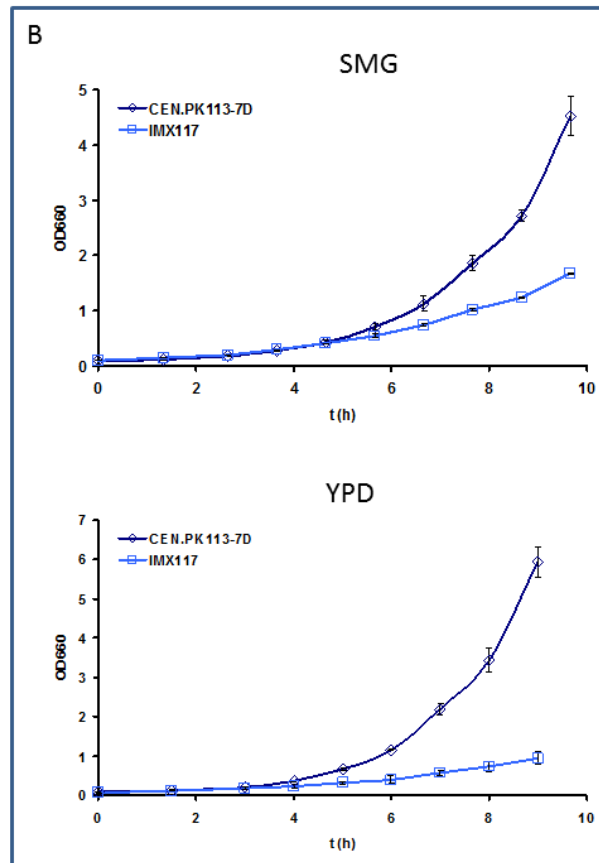

22

23 **Figure S1. Growth reduction of *pfk2* mutants.** *Saccharomyces cerevisiae*'s *pfk2* mutants

24 were obtained by deletion of the *PFK2* gene in the diploid strain CEN.PK1122 using a cassette

25 obtained by PCR using Phusion polymerase (Thermo fisher) and the primers 5'-

26 AGAACTAGATTTAGAGACTAGTTTAGCATTGGCCAAGAACTAACCATACGCAATGGATGTCCACGAG

27 CTCTCTACATTGCATGGAATCAGGGCCAGCTGAAGCTTCGTACGC-3' and 5'-

28 TTAACATTAATTGACATTAATAATAGAAAGTGTAAATAAAAGGTCATTTTCTTTTACGGTGTCCGGTCTC

29 GTAGACGGCGAGTATATGTATGCTGCATAGGCCACTAGTGGATCTG-3' and the plasmid pUG6 as

30 template. CEN.PK112 cells were transformed with the obtained cassette using the lithium-

31 acetate protocol (9). Mutants were then grown in sporulation media and spores were

32 dissected (A). The resulted *pfk2* mutant was termed IMX117 and used to inoculate shake

33 flask contained synthetic media or yeast extract and peptone liquid media with 2% glucose

34 as sole carbon source (SMG and YPD respectively). The changes in optical density at 660 nm

35 (OD660) of the culture was followed for 9 h **(B)**. The strain CEN.PK113-7D was used as  
 36 reference strain. The growth of *pfk2* mutants was significantly reduced (ca. 70% of the  
 37 growth of the reference strain). Data showed is the average of two independent culture  
 38 replicates, error bars represent the standard deviation.  
 39

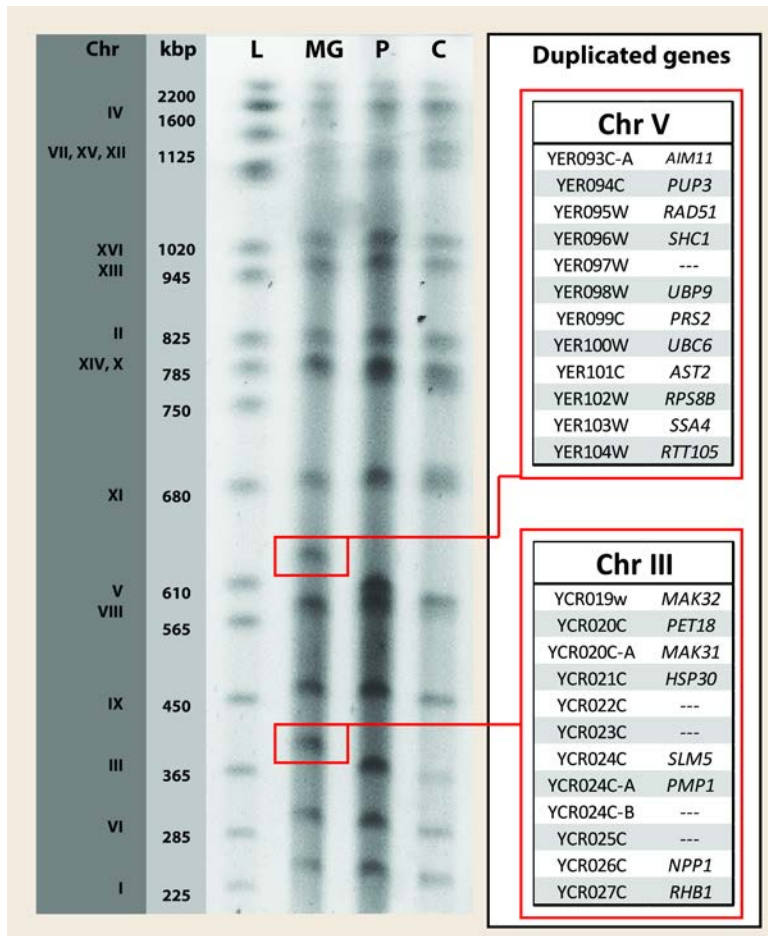

40  
 41 **Figure S2. Karyotype of the minimal glycolysis strain (MG), its parental strain CEN.PK102-**  
 42 **12A (P) and the reference strain CEN.PK113-7D (C).** Chromosomes of the different strains  
 43 (MG, P and C) were separated using CHEF electrophoresis. Size and chromosome order were  
 44 identified using the ladder (L) of *S. cerevisiae* YNN295. The size increase of the chromosomes  
 45 V and III in MG perfectly correlate with the duplication of 12 genes in chromosome V and 12  
 46 genes in chromosome III. Agarose Plugs for the different strains were prepared using the

47 CHEF yeast genomic DNA plugs Kit (Bio-Rad, Richmond, CA), following manufacturer's  
 48 recommendations, and used for CHEF electrophoresis. CHEF electrophoresis was performed  
 49 as previously described (7).

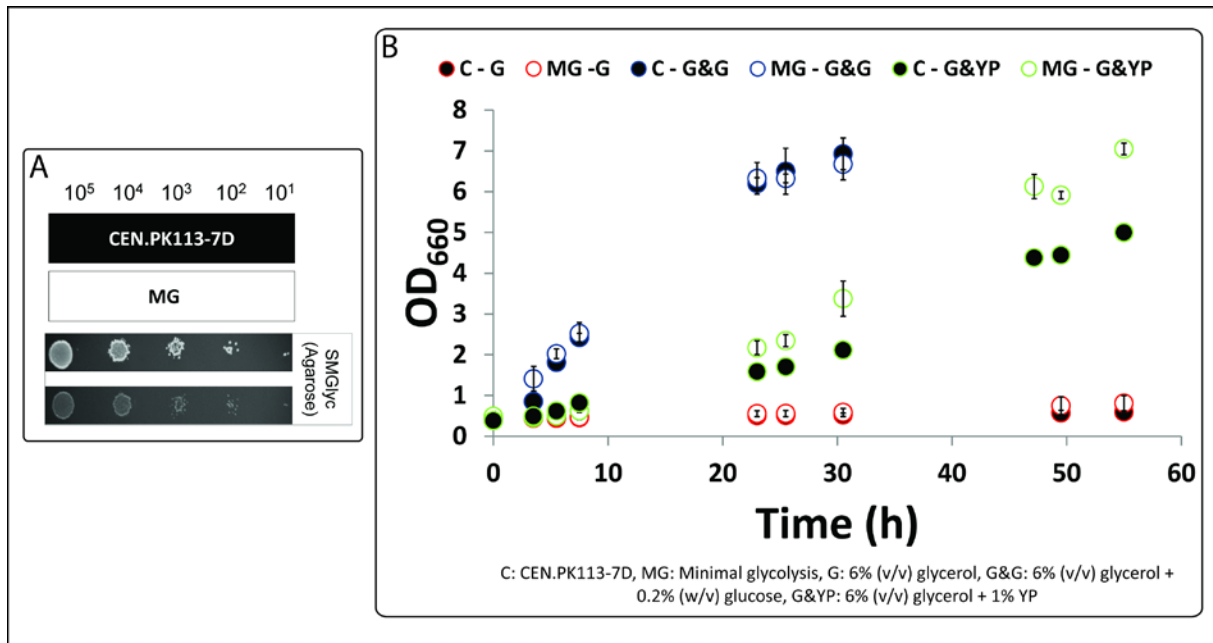

50  
 51 **Figure S3. Minimal glycolysis strain (MG) and CEN.PK113-7D (C) growth on media**  
 52 **containing glycerol as sole carbon source. A)** Serial dilutions of MG (bottom) and  
 53 CEN.PK113-7D (top) suspensions were inoculated in agarose plates containing synthetic  
 54 media with 6% (v/v) glycerol as sole carbon source (SMGlyc). **B)** MG (open circles) and  
 55 CEN.PK113-7D (C, closed circles) were inoculated in shake flasks containing synthetic media  
 56 with 6% (v/v) glycerol (G, red) and G enriched with 0.2% (v/v) glucose (G&G, blue) or 1%  
 57 yeast extract and peptone (G&YP, green). Optical density (OD,) measured at 660 nm, of the  
 58 different cultures was followed as an indication of biomass formation. The data in the plot  
 59 show the average values of two independent culture replicates for each cultivation  
 60 condition, the error bar represent the standard deviation.



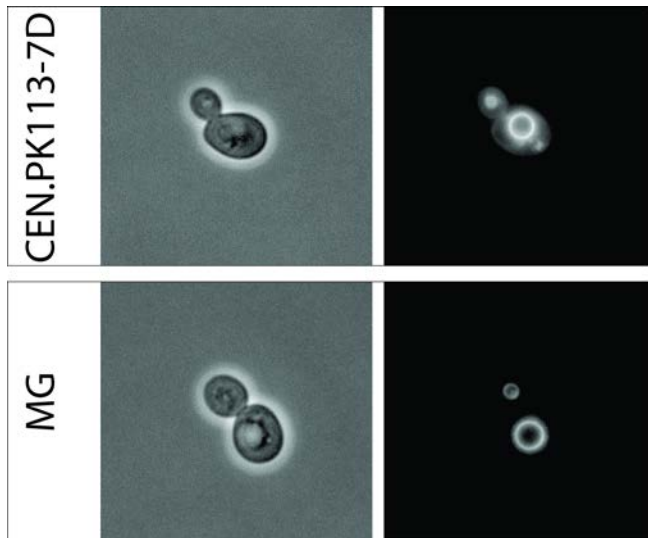

61

62 **Figure S4. Minimal glycolysis strain (MG) and CEN.PK113-7D vacuoles.** MG and CEN.PK113-  
63 7D vacuoles were stained with the red fluorescent dye FM4-64 (Excitation/emission  
64 ~515/640 nm) (Thermo Fisher Scientific) following manufacturer's recommendations. Yeast  
65 cells and vacuoles were visualized with an Imager-Z1 microscope equipped with an AxioCam  
66 MR camera, an EC Plan-Neofluar 100x/1.3 Oil Ph 3 M27 objective and the filter set: BP  
67 535/25, FT 580, LP 590 (Carl-Zeiss, Oberkochen, Germany).

## 68 **References**

- 69 1. **Entian KD & Kotter P.** 2007. 25 Yeast genetic strain and plasmid collections, p 629-666. *In*  
70 Stansfield I & Stark J (ed), *Methods in Microbiology*, Academic Press, Amsterdam,  
71 The Netherlands.
- 72 2. **Nijkamp JF, van den Broek M, Datema E, de Kok S, Bosman L, Luttik MA, Daran-Lapujade**  
73 **P, Vongsangnak W, Nielsen J, Heijne WHM, Klaassen P, Paddon CJ, Platt D,**  
74 **Kotter P, van Ham RC, Reinders MJT, Pronk JT, de Ridder D & Daran JM.** 2012. *De*  
75 *novo* sequencing, assembly and analysis of the genome of the laboratory strain  
76 *Saccharomyces cerevisiae* CEN.PK113-7D, a model for modern industrial  
77 biotechnology. *Microb Cell Fact* **11**(36):doi:10.1186/1475-2859-11-36.
- 78 3. **van Dijken JP, Bauer J, Brambilla L, Duboc P, Francois JM, Gancedo C, Giuseppin MLF,**  
79 **Heijnen JJ, Hoare M, Lange HC, Madden EA, Niederberger P, Nielsen J, Parrou JL,**  
80 **Petit T, Porro D, Reuss M, van Riel N, Rizzi M, Steensma HY, Verrips CT, Vindelov**  
81 **J & Pronk JT.** 2000. An interlaboratory comparison of physiological and genetic  
82 properties of four *Saccharomyces cerevisiae* strains. *Enzyme Microb Tech* **26**(9-  
83 10):706-714.
- 84 4. **Guldener U, Heinisch J, Koehler GJ, Voss D & Hegemann JH.** 2002. A second set of *LoxP*  
85 marker cassettes for *Cre*-mediated multiple gene knockouts in budding yeast.  
86 *Nucleic Acids Res* **30**(6):e23.
- 87 5. **Guldener U, Heck S, Fiedler T, Beinhauer J & Hegemann JH.** 1996. A new efficient gene  
88 disruption cassette for repeated use in budding yeast. *Nucleic Acids Res* **24**(13):2519-  
89 2524.

- 90 **6. de Kok S, Yilmaz D, Suir E, Pronk JT, Daran JM & van Maris AJA.** 2011. Increasing free-  
91 energy (ATP) conservation in maltose-grown *Saccharomyces cerevisiae* by  
92 expression of a heterologous maltose phosphorylase. *Metab Eng* **13**(5):518-526.
- 93 **7. Solis-Escalante D, Kuijpers NG, van der Linden FH, Pronk JT, Daran JM & Daran-Lapujade**  
94 **P.** 2014. Efficient simultaneous excision of multiple selectable marker cassettes  
95 using I-SceI-induced double-strand DNA breaks in *Saccharomyces cerevisiae*. *FEMS*  
96 *Yeast Res* **14**(5):741-754.
- 97 **8. Knijnenburg TA, Daran JMG, van den Broek MA, Daran-Lapujade PAS, de Winde JH,**  
98 **Pronk JT, Reinders MJT & Wessels LFA.** 2009. Combinatorial effects of  
99 environmental parameters on transcriptional regulation in *Saccharomyces*  
100 *cerevisiae*: A quantitative analysis of a compendium of chemostat-based  
101 transcriptome data. *BMC Genomics* **10**(53):doi: 10.1186/1471-2164-10-53.
- 102 **9. Gietz RD & Woods RA.** 2002. Transformation of yeast by lithium acetate/single-stranded  
103 carrier DNA/polyethylene glycol method. *Method Enzymol* **350**:87-96.
